# Supplementary material for: Antitoxin autoregulation of M. tuberculosis toxin-antitoxin expression through negative cooperativity arising from multiple inverted repeat sequences
Source: PubMed Central journal article supplement (PMC7319586; doi:10.1042/bcj20200368), 2020-06-26

## SUPPLEMENTARY DATA

### SUPPLEMENTARY FIGURES

**Fig. S1.** AbiEi and Rv2827c have similar folds. Structure-based sequence alignment of AbiEi and Rv2827c, drawn by hand using output from PROMALS3D. Blue arrows represent  $\beta$ -sheets and pink ovals represent  $\alpha$ -helices; numbers indicate amino acid positions.

**Fig. S2.** AbiEi binds with positive co-operativity to the IR1-IR2 region of the *abiE* promoter. (A) Sequence level cartoon of the fluorescently labelled probe containing IR1-IR2, with -35, -10, transcriptional start and ribosome binding site (RBS) indicated. (B) Electrophoretic mobility shift assay (EMSA) of titrated AbiEi with the probe in (A). (C) EMSA of titrated AbiEi with the probe in (A) altered by replacing IR2 with polyC. (D) EMSA of titrated AbiEi with the probe in (A) altered by replacing IR1 with polyC. (E) EMSA of titrated AbiEi with the probe in (A) altered by replacing both IR1 and IR2 with polyC. For (B-E); protein concentrations are shown on each panel together with the binding events (0, 1 or 2); S – each experiment contained 100-fold excess of the specific unlabelled probe; NS – each experiment contained 100-fold excess of non-specific unlabelled probe; numbering -1 to -71 denotes the promoter region included in the probe, upstream of the translational start site in order to include all of IR2. (F) Fractional saturation curve plotted using the EMSA data of (B). (G) Hill plot using the EMSA data from (B). For (F) and (G), points are plotted from triplicate data and display mean values with standard error of the mean.

**Fig. S3.** AbiEi and Rv2827c do not bind non-cognate promoters. (A) Electrophoretic mobility shift assay (EMSA) of titrated AbiEi with *rv2827c-rv2826c* promoter -1 to -71. (B) EMSA of titrated AbiEi with *rv2827c-rv2826c* promoter -61 to -131. (C) EMSA of titrated Rv2827c with *abiE* promoter -1 to -71. For (A-C); protein concentrations are shown below (C) together with the binding events (0, 1 or 2); S – each experiment contained 100-fold excess of the specific unlabelled probe; NS – each experiment contained 100-fold excess of non-specific unlabelled probe; numbering denotes the promoter region included in the probe, upstream of the translational start site in order to include all of the respective IR sequences.

**Fig. S4.** Rv1044 does not bind the cognate promoter but is capable of DNA-binding. (A) EMSA of titrated Rv1044 with *rv1044-rv1045* promoter -1 to -71. (B) EMSA of titrated Rv1044 with *rv1044-rv1045* promoter -61 to -131. (C) EMSA of titrated Rv1044 with *rv2827c-rv2826c* promoter -1 to -71. (D) EMSA of titrated Rv1044 with *rv2827c-rv2826c* promoter -61 to -131. (E) EMSA of titrated Rv1044 with *abiE* promoter -1 to -71. For (A-E); protein concentrations are shown on each panel together with the binding events (0, 1 or 2); S – each experiment contained 100-fold excess of the specific unlabelled probe; NS – each experiment contained 100-fold excess of non-specific unlabelled probe; numbering denotes the promoter region included in the probe, upstream of the translational start site in order to include all of the respective IR sequences. (F) Fractional saturation

curve plotted using the EMSA data of (E). (G) Hill plot using the EMSA data from (E). For (F) and (G), points are plotted from triplicate data and display mean values with standard error of the mean.

## SUPPLEMENTARY TABLES

**Table S1.** Oligonucleotides used in this study

| Primer                   | Sequence <sup>a</sup>                              | Notes (Organism/Gene)                                                   |
|--------------------------|----------------------------------------------------|-------------------------------------------------------------------------|
| <b>pRW50 cloning</b>     |                                                    |                                                                         |
| TRB1072                  | TTGAATTCGATTTTGTATCACAATAAATTGAGG                  | FWD EcoRI, 99 bp upstream of <i>abiEi</i> , <i>S. agalactiae</i>        |
| TRB1047                  | TTAAGCTTTACGGCCCCCACTTGTGTC                        | REV HindIII, 99 bp upstream of <i>abiEi</i> , <i>S. agalactiae</i>      |
| TRB1042                  | TTGAATTCGCCAAGCATCGGCTGGC                          | FWD EcoRI, 500 bp upstream of <i>rv2827c</i> , <i>M. tuberculosis</i>   |
| TRB1043                  | TTAAGCTTCCGAAGTTGAATTCACACCGG                      | REV HindIII, 500 bp upstream of <i>rv2827c</i> , <i>M. tuberculosis</i> |
| TRB1040                  | TTGAATTCGGGTCCCAACCGAGCGGC                         | FWD EcoRI, 500 bp upstream of <i>rv1044</i> , <i>M. tuberculosis</i>    |
| TRB1041                  | TTAAGCTTATTAGGTGATGGAGGCCAAGGCC                    | REV HindIII, 500 bp upstream of <i>rv1044</i> , <i>M. tuberculosis</i>  |
| <b>pSAT1-LIC cloning</b> |                                                    |                                                                         |
| TRB873                   | TTAATGCAGCTGATTAATACG                              | FWD pSAT LIC sequencing                                                 |
| TRB875                   | TACTCAAGCTTATGCATGC                                | REV pSAT LIC sequencing                                                 |
| TRB1048                  | CAACAGCAGACGGGAGGTTCAAAAAAAGAGATTCTACTCGATTTTATAG  | FWD <i>abiEi</i> LIC, <i>S. agalactiae</i>                              |
| TRB1049                  | GCGAGAACCAAGGAAAGGTTATTATATTAGAACTCCAGAGTTTGTTTAAC | REV <i>abiEi</i> LIC, <i>S. agalactiae</i>                              |
| TRB1022                  | CAACAGCAGACGGGAGGTGTGAGCCCAGCCGCGCC                | FWD <i>rv2827c</i> LIC, <i>M. tuberculosis</i>                          |

|         |                                                          |                                                |
|---------|----------------------------------------------------------|------------------------------------------------|
| TRB1023 | GCGAGAACCAAGGAAAGGTTATTACGCCTTGC<br>CGATCACGCGCAGC       | REV <i>rv2827c</i> LIC, <i>M. tuberculosis</i> |
| TRB1018 | CAACAGCAGACGGGAGGTTGTGCAAAACCGT<br>ATCTAATTGATACGATTGCGC | FWD <i>rv1044</i> LIC, <i>M. tuberculosis</i>  |
| TRB1019 | GCGAGAACCAAGGAAAGGTTATTACGCCGATG<br>CTCGCTTCGG           | REV <i>rv1044</i> LIC, <i>M. tuberculosis</i>  |

#### pTA100 cloning

|         |                                                       |                                                        |
|---------|-------------------------------------------------------|--------------------------------------------------------|
| TRB1052 | TTGAATTCAGGAGGACAGGGATGTCAAAAAA<br>AGAGATTCTACTC      | FWD EcoRI, <i>abiEi</i> , <i>S. agalactiae</i>         |
| TRB1053 | TTAAGCTTGGTTATTATATTAGAACCTCCAGA<br>GTTTG             | REV HindIII, <i>abiEi</i> , <i>S. agalactiae</i>       |
| PF1334  | TTTCATATGCAATTGAGGAGGACAGGGATGGT<br>GAGCCCAGCCG       | FWD NdeI/MfeI, <i>rv2827c</i> , <i>M. tuberculosis</i> |
| PF1335  | TTTACTAGTCCCGGGGTCACGCCTTGCCGATC                      | REV SpeI/XmaI, <i>rv2827c</i> , <i>M. tuberculosis</i> |
| PF1330  | TTTCATATGCAATTGAGGAGGACAGGGATGTG<br>TGCAAAACCGTATCTAA | FWD NdeI/MfeI, <i>rv1044</i> , <i>M. tuberculosis</i>  |
| PF1331  | TTTACTAGTCCCGGGCTTGGTCACGCCGATG                       | REV SpeI/XmaI, <i>rv1044</i> , <i>M. tuberculosis</i>  |

#### EMSA probe primers and templates

|         |                                                                                                     |                                                                                                              |
|---------|-----------------------------------------------------------------------------------------------------|--------------------------------------------------------------------------------------------------------------|
| TRB1067 | TGCGCACTGACAAAAGCTT                                                                                 | REV EMSA untagged                                                                                            |
| TRB1068 | /56-FAM/TGCGCACTGACAAAAGCTT                                                                         | REV EMSA 56-FAM (fluorescein) tagged                                                                         |
| TRB1061 | AAAAGAAAATGTTGCTTTTATAACCACAAATATT<br>GTAAAATTGTAGTGTAAGCAACAAGTGGGG<br>GGCCGTAAGCTTTTGTCAAGTGCAGCA | <i>S. agalactiae</i> / <i>abiEi</i> -1 to -71 WT (Fig. S2B, Fig. S3C, Fig. S4E)                              |
| TRB1065 | AAAAGAAAATGTTGCTTTTATAACCACA                                                                        | FWD for TRB1061, TRB1063, <i>S. agalactiae</i> , <i>abiEi</i>                                                |
| TRB1062 | AAAAGAAAACCCCCCCCCCTACCACAAATATT<br>GTAAAATTGTAGTGTAAGCAACAAGTGGGG<br>GGCCGTAAGCTTTTGTCAAGTGCAGCA   | <i>S. agalactiae</i> / <i>abiEi</i> -1 to -71 Mutant; inverted repeat 1 poly-C track substitution (Fig. S2D) |
| TRB1066 | AAAAGAAAACCCCCCCC                                                                                   | FWD for TRB1062, TRB1064, <i>S. agalactiae</i> , <i>abiEi</i>                                                |

|         |                                                                                                     |                                                                                                                                        |
|---------|-----------------------------------------------------------------------------------------------------|----------------------------------------------------------------------------------------------------------------------------------------|
| TRB1063 | AAAAGAAAATGTTGCTTTTATACCACAAATATT<br>GTAAAATTGTAGTGCCCCCCCCCAGTGGGG<br>GGCCGTAAGCTTTTGT CAGTGCGCA   | <i>S. agalactiae</i> / <i>abiEi</i> -1 to -71<br>Mutant; inverted repeat 2 poly-C<br>track substitution ( <b>Fig. S2C</b> )            |
| TRB1064 | AAAAGAAAACCCCCCCCCCTACCACAAATATT<br>GTAAAATTGTAGTGCCCCCCCCCAGTGGGG<br>GGCCGTAAGCTTTTGT CAGTGCGCA    | <i>S. agalactiae</i> / <i>abiEi</i> -1 to -71<br>Mutant; inverted repeat 1 & 2 poly-C<br>track substitution ( <b>Fig. S2E</b> )        |
| TRB1086 | AACTAGGCGCGCCTAGCCTGGACGAGTCCCCG<br>GGCCGACATTGCCCCGAGGCCTTGCCCTCCAT<br>CACCTAAAGCTTTTGT CAGTGCGCA  | <i>M. tuberculosis</i> H37Rv / <i>rv1044</i> , -1 to<br>-71 WT ( <b>Fig. S4A</b> )                                                     |
| TRB1087 | AACTAGGCGCGCCTAG                                                                                    | FWD for TRB1086, <i>M. tuberculosis</i> ,<br><i>rv1044</i>                                                                             |
| TRB1102 | GTATCTGCGACAAGGGCAGCGTCGATGCCTCG<br>ACATGCAGAGTCGGTGTTCGCTTACGCGAAC<br>TAGGCGCAAGCTTTTGT CAGTGCGCA  | <i>M. tuberculosis</i> H37Rv / <i>rv1044</i> , -61<br>to -131 WT ( <b>Fig. S4B</b> )                                                   |
| TRB1103 | GTATCTGCGACAAGGGCAG                                                                                 | FWD for TRB1102, <i>M. tuberculosis</i> ,<br><i>rv1044</i>                                                                             |
| TRB1104 | CAAGTGATTTCTTGAGTTTGAACATTGTTGCGT<br>ACAGATATAGTATAGTTTCCGGTGTGAATTCAA<br>GTTTCAAGCTTTTGT CAGTGCGCA | <i>M. tuberculosis</i> H37Rv / <i>rv2827c</i> , -1<br>to -71 WT ( <b>Fig. 4B</b> , <b>Fig. S3A</b> , <b>Fig. S4C</b> )                 |
| TRB1105 | CAAGTGATTTCTTGAGTTTGAACATTG                                                                         | FWD for TRB1104, TRB1271, <i>M.</i><br><i>tuberculosis</i> , <i>rv2827c</i>                                                            |
| TRB1106 | CAGGGCACTTGAGTTTGAACGGGTTTCGTAC<br>TGCTACTGACCGAAGCCCGTTCCTAAATCAAGT<br>GATTTCAAGCTTTTGT CAGTGCGCA  | <i>M. tuberculosis</i> H37Rv / <i>rv2827c</i> , -61<br>to -131 WT ( <b>Fig. 5B</b> , <b>Fig. S3B</b> , <b>Fig.</b><br><b>S4D</b> )     |
| TRB1107 | CAGGGCACTTGAGTTTGAAC                                                                                | FWD for TRB1106, TRB1277, full-<br>length -1 to -131 ( <b>Fig. 6A</b> ), <i>M.</i><br><i>tuberculosis</i> , <i>rv2827c</i>             |
| TRB1108 | TGGCATTCAATCGATGGCTTCTAGTTTATAGAT<br>GATTAGGGCTTGTCCCAAATGGATTGAGAGGT<br>TGACAAAGCTTTTGT CAGTGCGCA  | Plasmid pEFER, 12851-12920 bp NS<br>probe ( <b>Fig. 4 – 6</b> , <b>Fig. S2 – S4</b> )                                                  |
| TRB1109 | TGGCATTCAATCGATGGCTT                                                                                | FWD plasmid pEFER NS probe                                                                                                             |
| TRB1271 | CAAGTGATTCCCCCCCCCCCCCCCCCCCCCTA<br>CAGATATAGTATAGTTTCCGGTGTGAATTCAAG<br>TTCGAAGCTTTTGT CAGTGCGCA   | <i>M. tuberculosis</i> H37Rv / <i>rv2827c</i> , -1<br>to -71 Mutant; inverted repeat 3<br>poly-C track substitution ( <b>Fig. 4D</b> ) |
| TRB1272 | CAAGTGATTCCCCCCCC                                                                                   | FWD for TRB1271, TRB1274, <i>M.</i><br><i>tuberculosis</i> , <i>rv2827c</i>                                                            |
| TRB1273 | CAAGTGATTTCTTGAGTTTGAACATTGTTGCGT<br>ACAGATATAGTACCCCCCCCCCCCCCCCCCCC                               | <i>M. tuberculosis</i> H37Rv / <i>rv2827c</i> , -1<br>to -71 Mutant; inverted repeat 4                                                 |

|         |                                                                                               |                                                                                                                                        |
|---------|-----------------------------------------------------------------------------------------------|----------------------------------------------------------------------------------------------------------------------------------------|
|         | CCTCGAAGCTTTTGTCAAGTGC                                                                        | poly-C track substitution ( <b>Fig. 4C</b> )                                                                                           |
| TRB1274 | CAAGTGATTCCCCCCCCCCCCCCCCCCCCCTA<br>CAGATATAGTACCCCCCCCCCCCCCCCCCCCC<br>CTCGAAGCTTTTGTCAAGTGC | <i>M. tuberculosis</i> H37Rv / <i>rv2827c</i> , -1 to -71 Mutant; inverted repeat 3 & 4 poly-C track substitution ( <b>Fig. 4E</b> )   |
| TRB1275 | CAGGGCCCCCCCCCCCCCCCCCCCCCTACT<br>GTCACTGACCGAAGCCCGTTCCTAAATCAAGT<br>GATTTAAGCTTTTGTCAAGTGC  | <i>M. tuberculosis</i> H37Rv / <i>rv2827c</i> , -61 to -131 Mutant; inverted repeat 1 poly-C track substitution ( <b>Fig. 5D</b> )     |
| TRB1276 | CAGGGCCCCCCCC                                                                                 | FWD for TRB1275, TRB1278, <i>M. tuberculosis</i> , <i>rv2827c</i>                                                                      |
| TRB1277 | CAGGGCACTTGAGTTTGGAAACGGGTTTCGTAC<br>TGTCACTGACCCCCCCCCCCCCCCCCCCCC<br>GATTTAAGCTTTTGTCAAGTGC | <i>M. tuberculosis</i> H37Rv / <i>rv2827c</i> , -61 to -131 Mutant; inverted repeat 2 poly-C track substitution ( <b>Fig. 5C</b> )     |
| TRB1278 | CAGGGCCCCCCCCCCCCCCCCCCCCCTACT<br>GTCACTGACCCCCCCCCCCCCCCCCCCCCCG<br>ATTTAAGCTTTTGTCAAGTGC    | <i>M. tuberculosis</i> H37Rv / <i>rv2827c</i> , -61 to -131 Mutant; inverted repeat 1 & 2 poly-C track substitution ( <b>Fig. 5E</b> ) |

---

<sup>a</sup>EMSA probe sequences are fused with a constant region from the *lacZ* gene of pRW50, highlighted in grey. The reverse primers (TRB1067 and TRB1069) anneal to this sequence for amplification.

**Table S2.** Plasmids used in this study

| Plasmid   | Construct                              | Cloning technique            | Primer set/Restriction enzymes used | Reference |
|-----------|----------------------------------------|------------------------------|-------------------------------------|-----------|
| pPF656    | pTA100- <i>rv1044</i>                  | Restriction Cloning          | PF1330/PF1331                       | This work |
| pPF658    | pTA100- <i>rv2827c</i>                 | Restriction Cloning          | PF1334/PF1335                       | This work |
| pRLD30    | pTRB30-His <sub>6</sub> - <i>abiEi</i> | -                            | -                                   | [15]      |
| pRW50     | Tc <sup>R</sup>                        | -                            | -                                   | [32]      |
| pSAT1-LIC | Ap <sup>R</sup>                        | -                            | -                                   | This work |
| pTA100    | Sm <sup>R</sup>                        | -                            | -                                   | [5]       |
| pTRB481   | pTA100- <i>abiEi</i>                   | Restriction Cloning          | TRB1052/TRB1053                     | This work |
| pTRB483   | pRW50-500 bp upstream <i>rv1044</i>    | Restriction Cloning          | TRB1040/TRB1041                     | This work |
| pTRB484   | pRW50-500 bp upstream <i>rv2827c</i>   | Restriction Cloning          | TRB1042/TRB1043                     | This work |
| pTRB486   | pRW50-99 bp upstream <i>abiEi</i>      | Restriction Cloning          | TRB1072/TRB1047                     | This work |
| pTRB491   | pSAT1-LIC- <i>rv1044</i>               | Ligation Independent Cloning | TRB1018/TRB1019                     | This work |
| pTRB493   | pSAT1-LIC- <i>rv2827c</i>              | Ligation Independent Cloning | TRB1022/TRB1023                     | This work |
| pTRB525   | pSAT1-LIC- <i>abiEi</i>                | Ligation Independent Cloning | TRB1048/TRB1049                     | This work |

AbiEi: 2 -----SKKEILLDFIEKNNG-IVTNKDCKALGIP-----TIYLTRLEKEGII 42  
 Rv2827c: 2 VSPAGADRRIPRTWASRVVSGLARDRPVVVTKEDLTQRLTEAGCGRDPSAISRELRRIG-- 59  
 Consensus ss: 

AbiEi: 43 FRVE-----KGIFLTQNG--DYDEYYFFQYRF-----PKAIFSYISALYLQQFTDEIPQ 89  
 Rv2827c: 60 WLIVQLPVKGTWAFIPPGEAAISDPY-LPLRSWLARDQNAGFMLAGASAAWHLGYLDRQPD 118  
 Consensus ss: 

AbiEi: 90 Y-FDVTVPRG-YRFNTPPANLNIHFVSKEYS-E-LGMT-----TVPTPMGNV 133  
 Rv2827c: 119 GRIPILWPPAKRLPDGLASYVSVVRIPWNAADTALLAPRPALLVRRRLDLVAWA---TGL 175  
 Consensus ss: 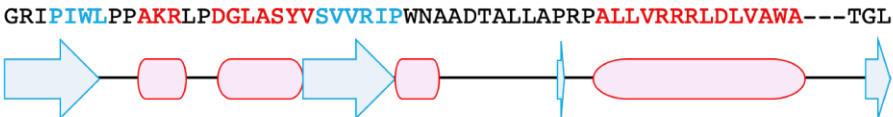

AbiEi: 134 RVYDFERIIICDFVIHREKIDSELFVKTLQSYGNYPKKNL-AKLYEYATKMN--TLEKVKQ 190  
 Rv2827c: 176 PALGPEALLVQIATRPA SF-GPWADLVPHLDDLVDCSDERLERLLSGRPTS AWQRASYL 234  
 Consensus ss: 

AbiEi: 191 TLEVL I----- 196  
 Rv2827c: 235 LDSGGEPARGQALLAKRHTEVMPVTRFTTAHSRDRGESVWAP EYQLVDELVVPLL RVIGKA 295  
 Consensus ss: 

-35 IR1

-10 IR2

RBS

AAAAGAAAATGTTGCTTTTATACCACAAATATTGAAAATTGTAGTGTA AAAAGCAACAAGTGGGGGGCCGT

[AbiEi]

S

NS

B

*abiEi* -1 to -71  
IR1 – IR2

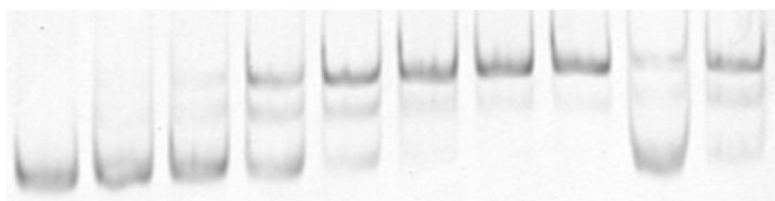Protein ( $\mu\text{M}$ )

0

0.025

0.075

0.2

0.5

1.0

2.0

5.0

0.5

0.5

C

*abiEi* -1 to -71  
IR1 – IR2

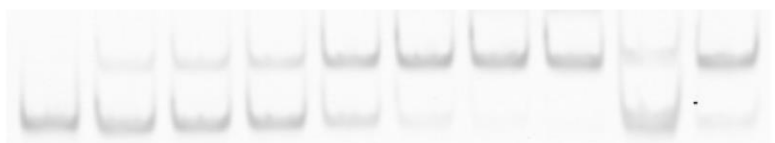Protein ( $\mu\text{M}$ )

0

0.0078

0.015

0.03

0.0625

0.125

0.25

0.5

0.25

0.25

D

*abiEi* -1 to -71  
IR4 – IR2

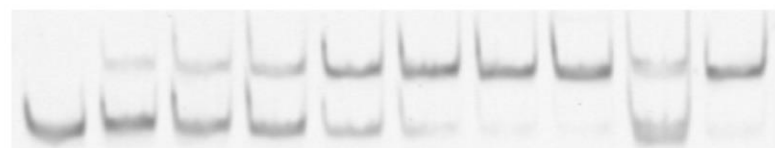Protein ( $\mu\text{M}$ )

0

0.0125

0.025

0.05

0.075

0.2

0.5

2.0

0.075

0.075

E

*abiEi* -1 to -71  
IR4 – IR2

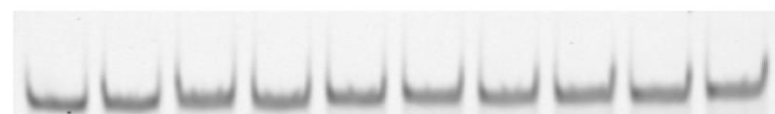Protein ( $\mu\text{M}$ )

0

0.025

0.075

0.2

0.5

1.0

2.0

0.5

0.5

F

*abiEi* -1 to -71  
Saturation curve

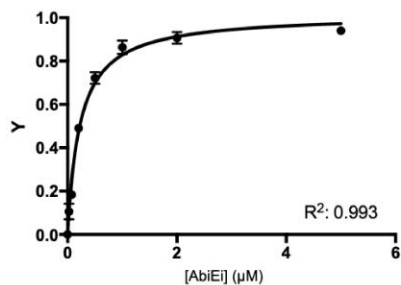

G

*abiEi* -1 to -71  
Hill plot

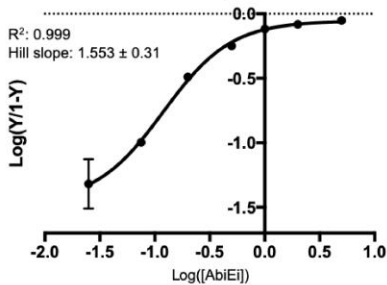



[Protein]

S

NS

A

AbiEi with  
*rv2827c* -1 to -71

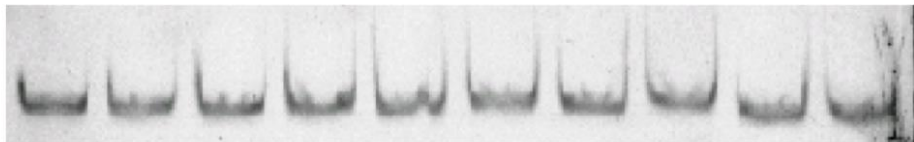

B

AbiEi with  
*rv2827c* -61 to -131

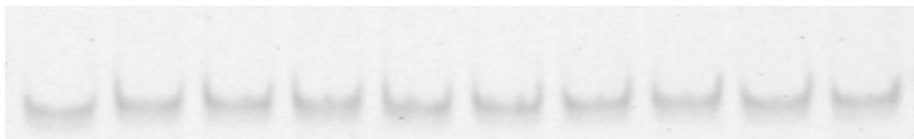

C

Rv2827c with  
*abiEi* -1 to -71

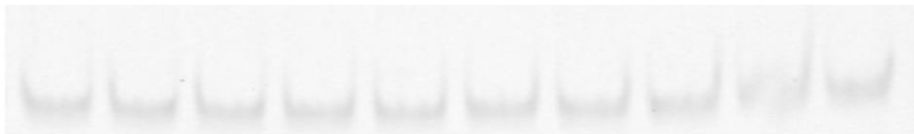

Protein (μM)

0

0.06125

0.125

0.25

0.5

1.0

2.0

5.0

2.0

2.0

[Rv1044]

S NS

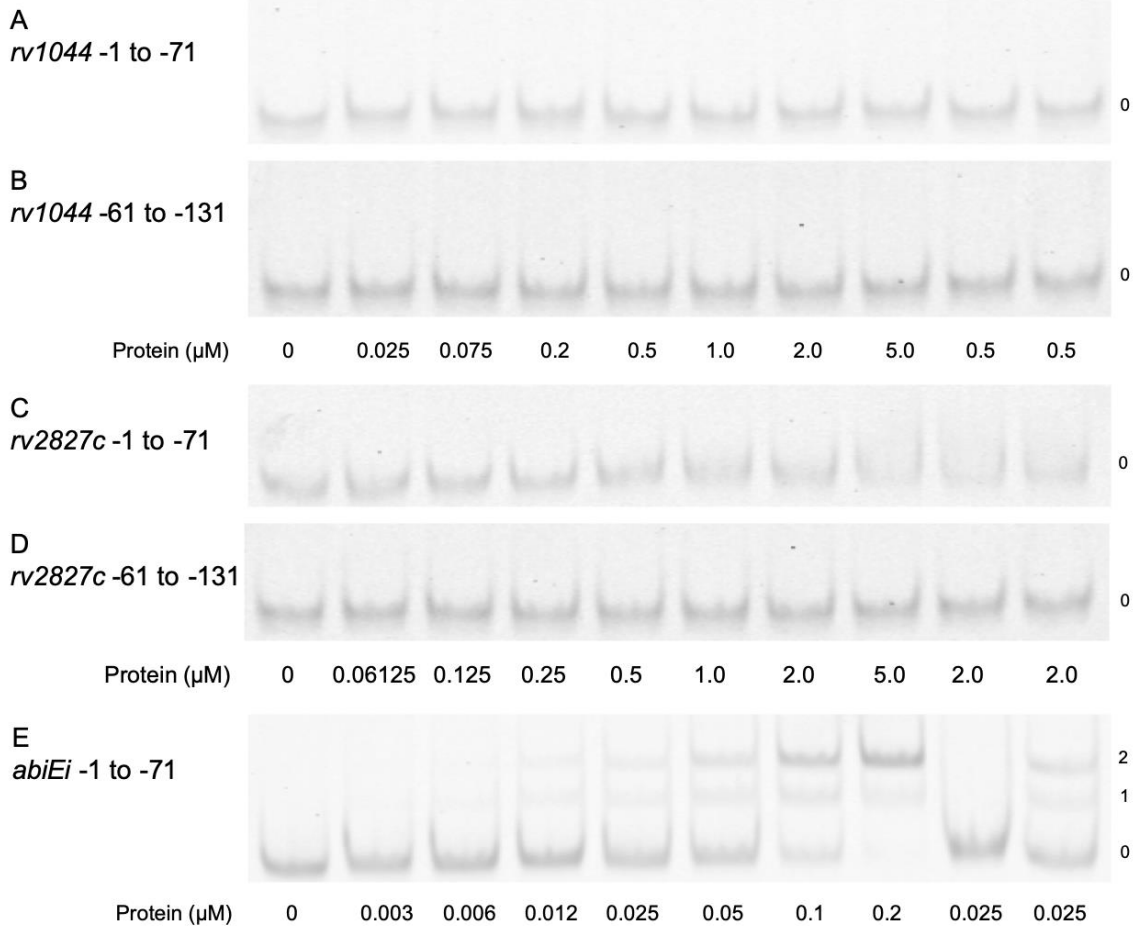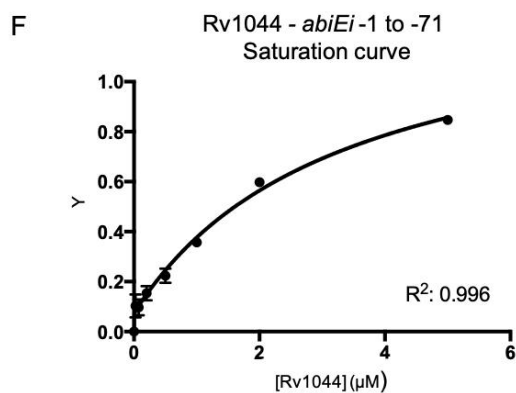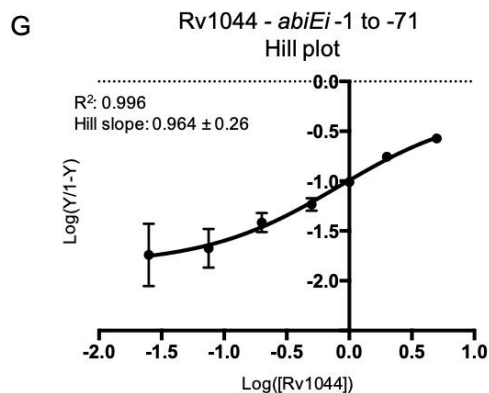

Supplement: BCJ-477-2401-s1.pdf [file BCJ-477-2401-s1.pdf]
